# Supplementary material for: The effect of fluorine doping on the photocatalytic properties of hematite for water splitting
Source: Royal Society of Chemistry journal article supplement (doi:10.1039/c8ce01368c), 2018-01-01
Supplement: c8ce01368c1.pdf [file c8ce01368c1.pdf]

## Supporting Information

### The effect of fluorine doping on photocatalytic properties of hematite for water splitting

Yongxiang Zhu, Jie Xu, Hui Jiang, Dongfang Niu, Xinsheng Zhang\* and Shuozen Hu\*

(State Key Laboratory of Chemical Engineering, East China University of Science and Technology,  
Shanghai 200237, China.)

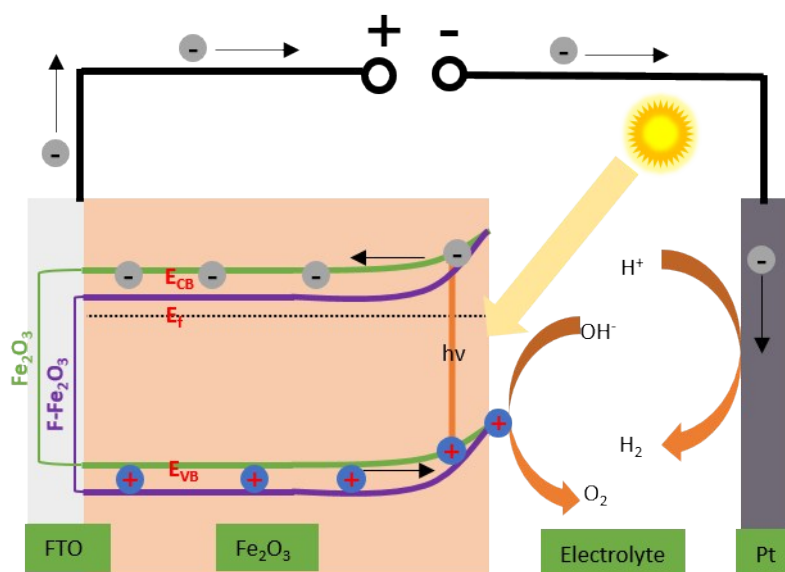

Figure S1. The schematic diagrams of the band structure and electron transfer process of the F-doped hematite during PEC water splitting.

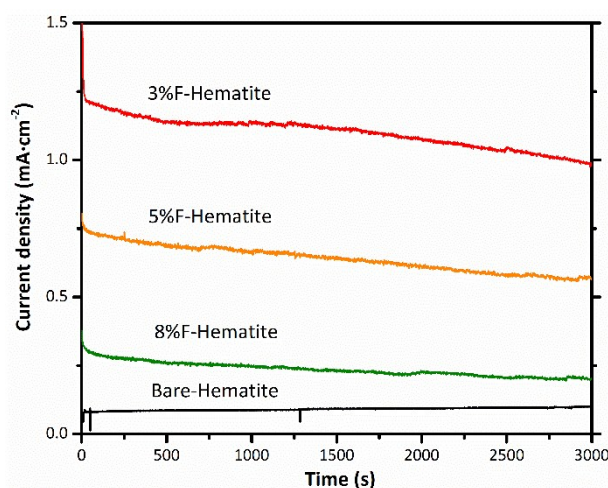

Figure S2. Chronoamperometry plots for F-doped hematite samples at 1.23 V vs. RHE under simulated solar illumination (AM 1.5 G, 100 mW·cm<sup>-2</sup>).

Table S1. Detailed parameters of XRD pattern for F doped hematite samples

| Samples       | (104)   |      | (110)   |      |
|---------------|---------|------|---------|------|
|               | 2-Theta | d(Å) | 2-Theta | d(Å) |
| Bare-hematite | 33.18   | 2.70 | 35.70   | 2.52 |
| 3%F-hematite  | 33.12   | 2.70 | 35.62   | 2.52 |
| 5%F-hematite  | 33.13   | 2.70 | 35.65   | 2.52 |
| 8%F-hematite  | 33.12   | 2.70 | 35.64   | 2.52 |

Table S2. Comparison of various doped hematite samples in PEC system

| Samples                                                     | Photocurrent density      | Applied potential | Test Conditions                              | Ref.      |
|-------------------------------------------------------------|---------------------------|-------------------|----------------------------------------------|-----------|
| S-Fe <sub>2</sub> O <sub>3</sub> nanorods                   | 1.42 mA·cm <sup>-2</sup>  | 1.23 V vs RHE     | 1 M NaOH, AM 1.5G, 100 mW·cm <sup>-2</sup>   | 1         |
| Grad-P: Fe <sub>2</sub> O <sub>3</sub> nanorods             | 1.48 mA·cm <sup>-2</sup>  | 1.23 V vs. RHE    | 1 M KOH, AM 1.5G, 100 mW·cm <sup>-2</sup>    | 2         |
| P-Fe <sub>2</sub> O <sub>3</sub> nanowires                  | 2.3 mA·cm <sup>-2</sup>   | 1.23 V vs. RHE    | 1 M NaOH, AM 1.5G, 100 mW·cm <sup>-2</sup>   | 3         |
| Se- Fe <sub>2</sub> O <sub>3</sub> nanorods                 | 1.44 mA·cm <sup>-2</sup>  | 1.23 V vs. RHE    | 1 M NaOH, AM 1.5G, 100 mW·cm <sup>-2</sup>   | 4         |
| Ti-Fe <sub>2</sub> O <sub>3</sub> thin films                | 1.64 mA·cm <sup>-2</sup>  | 1.23 V vs. RHE    | 1 M KOH, AM 1.5G, 100 mW·cm <sup>-2</sup>    | 5         |
| Cu-Fe <sub>2</sub> O <sub>3</sub> flower-like nanostructure | -5.34 mA·cm <sup>-2</sup> | -0.6 V vs. RHE    | 0.1 M NaOH, AM 1.5G, 100 mW·cm <sup>-2</sup> | 6         |
| F- Fe <sub>2</sub> O <sub>3</sub> films                     | 1.24 mA·cm <sup>-2</sup>  | 1.23 V vs. RHE    | 1 M NaOH, AM 1.5G, 100 mW·cm <sup>-2</sup>   | This work |

## Notes and references

1. R. Zhang, Y. Fang, T. Chen, F. Qu, Z. Liu, G. Du, A. M. Asiri, T. Gao and X. Sun, ACS Sustainable Chem. Eng., 2017, **5**, 7502-7506.
2. Z. Luo, C. Li, S. Liu, T. Wang and J. Gong, Chem. Sci., 2017, **8**, 91-100.
3. Y. Zhang, S. Jiang, W. Song, P. Zhou, H. Ji, W. Ma, W. Hao, C. Chen and J. Zhao, Energy Environ. Sci., 2015, **8**, 1231-1236.
4. R. Zhang, L. Yang, X. Huang, T. Chen, F. Qu, Z. Liu, G. Du, A. M. Asiri and X. Sun, J. Mater. Chem. A, 2017, **5**, 12086-12090.
5. T. S. Atabaev, M. Ajmal, N. H. Hong, H. K. Kim and Y. H. Hwang, Appl. Phys. A, 2015, **118**, 1539-1542.
6. E. L. Tsege, T. S. Atabaev, M. A. Hossain, D. Lee, H.-K. Kim and Y.-H. Hwang, J. Phys. Chem. Solids, 2016, **98**, 283-289.
